# Supplementary material for: Tempo-Spatial Variations of Ambient Ozone-Mortality Associations in the USA: Results from the NMMAPS Data
Source: PubMed Central journal article supplement (PMC5036684; doi:10.3390/ijerph13090851), 2016-08-26
Supplement: ijerph-13-00851-s001.pdf [file ijerph-13-00851-s001.pdf]

# Supplementary Materials: Temporal-Spatial Variations of Ambient Ozone-Mortality Associations in the USA: Results from the NMMAPS Data

Tao Liu, Weilin Zeng, Hualiang Lin, Shannon Rutherford, Jianpeng Xiao, Xing Li, Zhihao Li, Zhengmin Qian, Baixiang Feng and Wenjun Ma

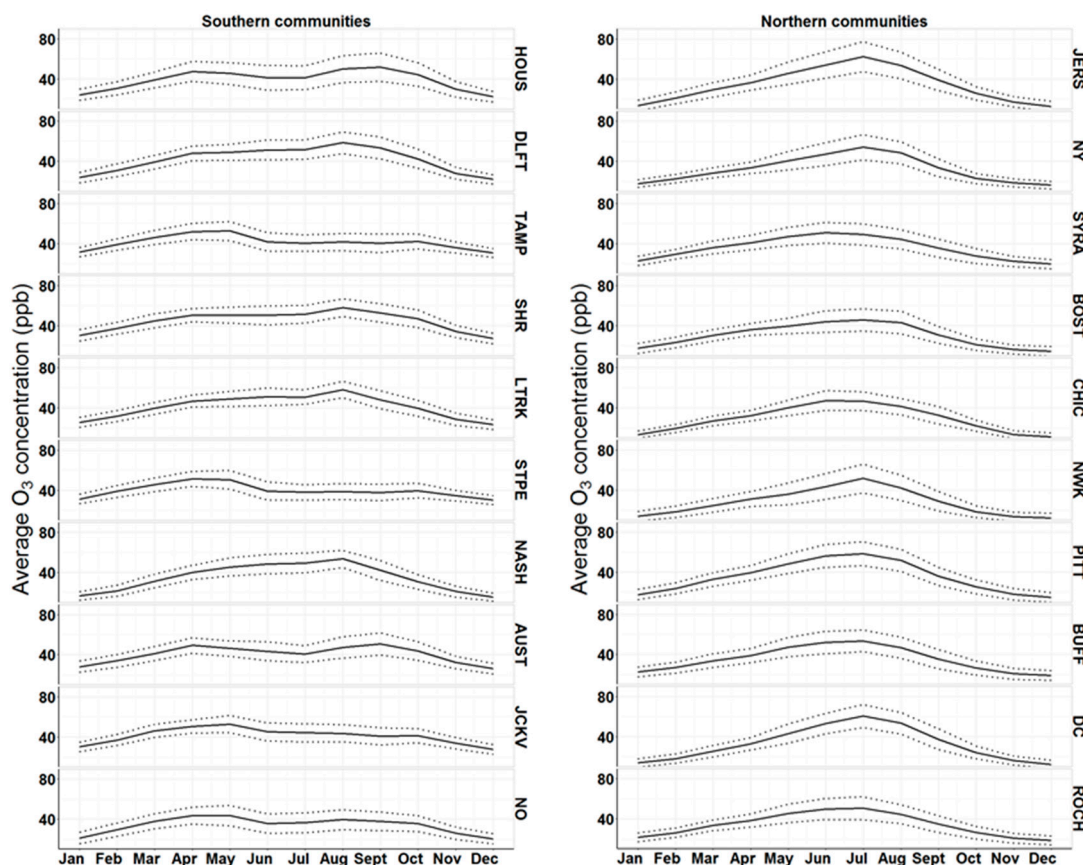

**Figure S1.** Monthly average maximum 8 h O<sub>3</sub> concentration (ppb) in the 20 study communities in the USA. HOUS: Houston; DLFT: Dallas; TAMP: Tampa; SHR: Shreveport; LTRK: Little Rock; STPE: St. Petersburg; NASH: Nashville; AUST: Austin; JCKV: Jacksonville; NO: New Orleans; JERS: Jersey City; NY: New York; SYRA: Syracuse; BOST: Boston; CHIC: Chicago; NWK: Newark; PITT: Pittsburgh; BUFF: Buffalo; DC: Washington; ROCH: Rochester.

**Table S1.** Sensitivity analyses on the impacts (Excess risk, 95% CI) of lag structure on the effects of ozone on mortality.

|        | Average TM | Southern Communities |                     |                     | Average TM | Northern Communities |                     |                      |
|--------|------------|----------------------|---------------------|---------------------|------------|----------------------|---------------------|----------------------|
|        | (°C)       | Model I              | Model II            | Model III           | (°C)       | Model I              | Model II            | Model III            |
| Spring | 19.6       | -0.23 (-0.61, 0.12)  | -0.07 (-0.49, 0.36) | 0.06 (-0.40, 0.53)  | 9.9        | 0.68 * (0.33, 1.04)  | 0.74 * (0.33, 1.16) | 0.65 * (0.21, 1.10)  |
| Summer | 27.9       | -0.08 (-0.37, 0.20)  | -0.17 (-0.47, 0.13) | -0.04 (-0.36, 0.29) | 22.4       | 1.14 * (0.92, 1.37)  | 1.21 * (0.72, 1.71) | 1.09 * (0.76, 1.41)  |
| Autumn | 20.5       | 0.36 * (0.04, 0.69)  | 0.40 * (0.05, 0.75) | 0.38 * (0.01, 0.76) | 12.3       | 0.67 * (0.32, 1.03)  | 0.52 * (0.08, 0.96) | 0.27 (-0.21, 0.76)   |
| Winter | 11.7       | 0.30 (-0.22, 0.83)   | 0.27 (-0.30, 0.84)  | 0.14 (-0.46, 0.74)  | -0.19      | -0.52 (-1.10, 0.07)  | -0.65 (-1.57, 0.28) | -0.32 (-1.03, -0.40) |

Model I: The ERs of lag0-1 day average ozone concentration on mortality after adjustment for daily temperature, time, day of week and relative humidity (RH); Model II: The ERs of lag0-2 day average ozone concentration on mortality after adjustment for daily temperature, time, day of week and RH; Model III: The ERs of lag0-3 day average ozone concentration on mortality after adjustment for daily temperature, time, day of week and RH. \* $p < 0.05$ .

**Table S2.** Changes in ozone related morality effect estimates (% , 95% CI) per interval increase in a city-specific characteristic.

|                                       | <b>Change (% , 95% CI)</b> |
|---------------------------------------|----------------------------|
| <b>Latitude (per 1°)</b>              |                            |
| Spring                                | 9.4 * (4.1, 14.0)          |
| Summer                                | 13.9 * (8.3, 19.7)         |
| Autumn                                | 3.0 (-4.9, 11.6)           |
| Winter                                | -3.9 (-13.9, 7.3)          |
| <b>Average temperature (per 1 °C)</b> |                            |
| Spring                                | -8.6 * (-13.9, -3.0)       |
| Summer                                | -21.3 * (-29.5, -13.1)     |
| Autumn                                | -3.9 (-12.2, 6.2)          |
| Winter                                | 2.0 (-6.8, 12.7)           |
| <b>Relative humidity (per 1%)</b>     |                            |
| Spring                                | -11.3 * (-18.1, -4.9)      |
| Summer                                | -6.8 (-13.9, 0.02)         |
| Autumn                                | -6.8 (-13.9, 1.0)          |
| Winter                                | -1.0 (-13.1, 11.6)         |

\*  $p < 0.05$ .**Table S3.** The ERs in mortality for each 10 ppb increment in daily 8-h maximum ozone concentration (lag0-2 day average) in the community with the maximum concentration of ozone in each season.

|        | <b>Southern Communities</b> |                     | <b>Northern Communities</b> |                    |
|--------|-----------------------------|---------------------|-----------------------------|--------------------|
|        | Community                   | ER # (% , 95% CI)   | Community                   | ER # (% , 95% CI)  |
| Spring | Tampa                       | -0.18 (-1.58, 1.23) | Syracuse                    | 0.97 (-1.25, 3.24) |
| Summer | Little Rock                 | -1.58 (-3.47, 0.34) | Washington                  | 1.30 (0.01, 2.60)  |
| Autumn | Dallas                      | 0.82 (0.07, 1.57)   | Syracuse                    | 2.11 (-0.34, 4.63) |
| Winter | Tampa                       | -0.98 (-2.88, 0.96) | Syracuse                    | 1.23 (-1.45, 3.99) |

#: Adjustment for daily TM, time, day of week and RH.
